# Supplementary material for: Minute-scale persistence of a GPCR conformation state triggered by non-cognate G protein interactions primes signaling
Source: PubMed Central journal article supplement (PMC6811539; doi:10.1038/s41467-019-12755-9), 2019-10-23
Supplement: 41467_2019_12755_MOESM1_ESM.pdf [file 41467_2019_12755_MOESM1_ESM.pdf]

## Supplementary Information

Supplementary information for

**Minute-scale persistence of a GPCR conformation state triggered by non-cognate G protein interactions primes signaling.**

*Gupte et al.*

*Contents-*

Supplementary Figure 1 – Supplementary Figure 7

Supplementary Table 1 – Supplementary Table 3.

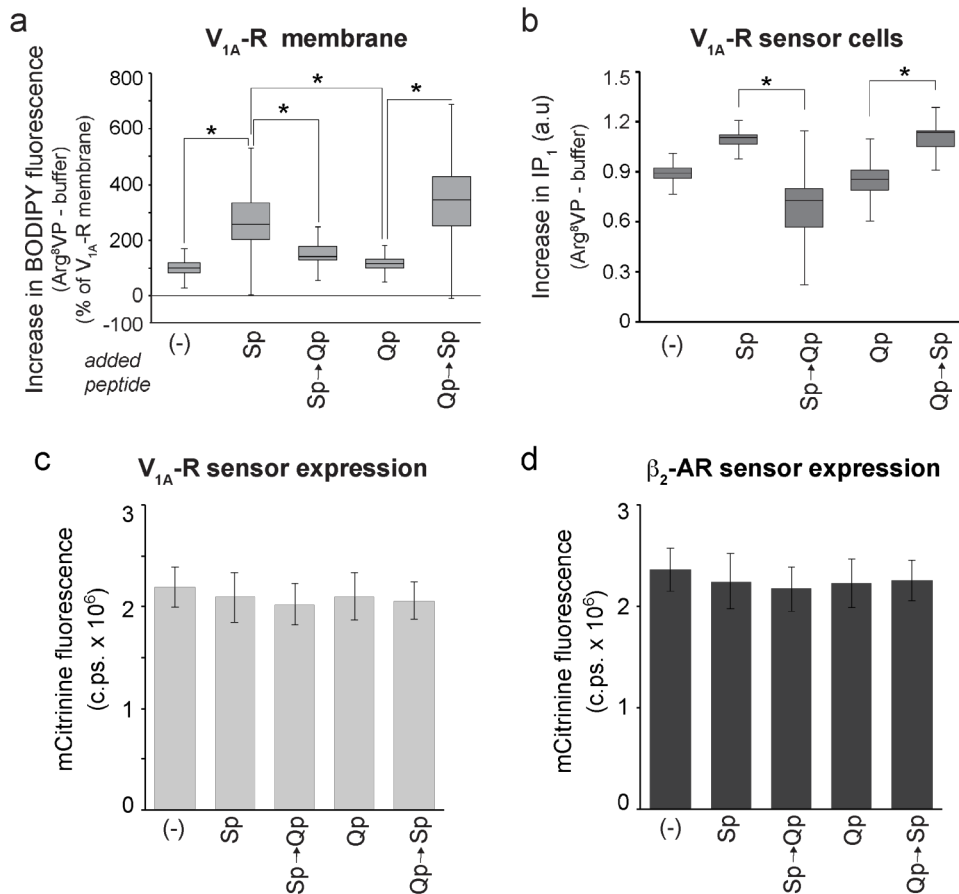

*Supplementary Figure 1 - Hot-spot substitutions in Ga peptides affect G protein activation and downstream signaling from V<sub>1A</sub>-R.* (a) Activation of G protein (Gαq) is monitored by the increase in BODIPY fluorescence upon agonist stimulation of membranes harvested from HEK293T cells expressing V<sub>1A</sub>-R, and reconstituted with purified Gαq. Presence of the indicated Gα peptides, (cognate (Qp), non-cognate (Sp), cognate to non-cognate (Qp → Sp), and non-cognate to cognate (Sp → Qp)) affects the magnitude of G protein activation, expressed as a percentage normalized to the change observed in the absence of added peptide (-). (b) Downstream signaling from cells expressing equivalent amounts of V<sub>1A</sub>-R SPASM sensor was measured by monitoring IP<sub>1</sub> levels following agonist stimulation. Box-and-whisker plots: centre line is median, box ends are upper and lower quartiles, whisker ends are  $1.5 \times \text{interquartile range (IQR)}$  from four independent experiments with at least three replicates per experiment ( $n \geq 4$ ). Statistically significant differences were assessed by a one-way ANOVA, followed by Tukey's post-ANOVA test. Significance is denoted by asterisks, \*,  $p < 0.05$ .

Equivalent sensor expression of the different V<sub>1A</sub>-R SPASM sensors (c) and β<sub>2</sub>-AR SPASM sensors (corresponding to downstream assays in Fig. 2d) is inferred from the fluorescence intensity of equal numbers of cells for each sensor. Values are mean ± S.D from at least 3 separate experiments.

**a** Dynabeads bind biotinylated Qp (bioQp)

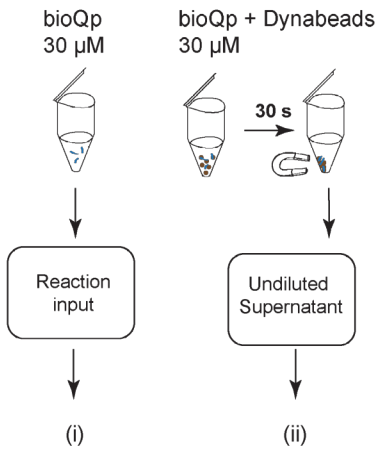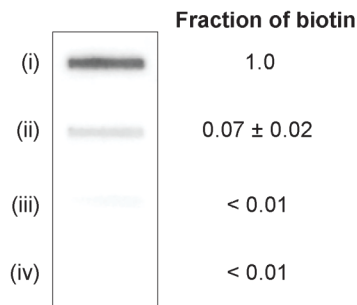

**b** Depletion of biotinylated Qp by Dynabeads

$\beta_2$ -mCer (10 nM) + ISO (100  $\mu$ M) + bioQp (30  $\mu$ M) Biotin detection standards

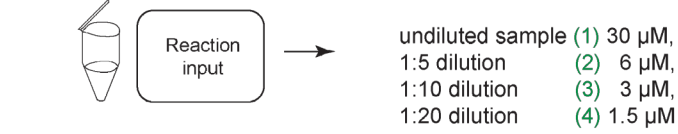

$\beta_2$ -mCer (10 nM) + ISO (100  $\mu$ M) + bioQp (30  $\mu$ M) + Dynabeads

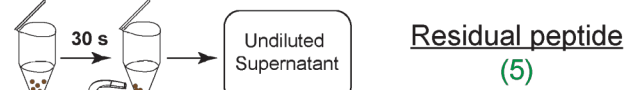

$\beta_2$ -mCer (10 nM) + ISO (100  $\mu$ M)

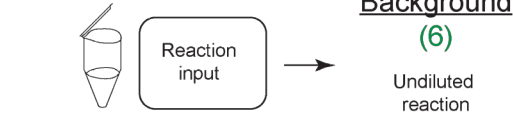

Detection of residual bioQp

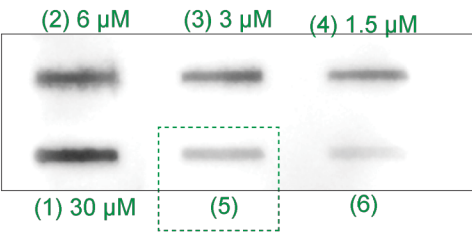

**bioQp estimation (5 - 6)**

| Input ( $\mu$ M) | Residual ( $\mu$ M) | Average residual ( $\mu$ M) |
|------------------|---------------------|-----------------------------|
| 30               | 1.01                | 1.6<br>±<br>1.08            |
| 30               | 3.13                |                             |
| 30               | 0.71                |                             |
| 30               | 1.56                |                             |

*Supplementary Figure 2 - Depletion of biotinylated Qp.* (a) Streptavidin-coated magnetic beads (brown circles) bind to biotinylated Qp (bioQp) from solution. Binding is quantified by Western blotting of the samples for biotin (i- 30  $\mu$ M bioQp, ii- supernatant after binding to Streptavidin-coated magnetic beads, iii - 30  $\mu$ M Qp, iv- buffer control). (b) Streptavidin-coated magnetic beads (brown circles) deplete bioQp to sub-critical concentration, in the presence of  $\beta_2$ -mCer membranes. Reactions containing 30  $\mu$ M bioQp, 10 nM  $\beta_2$ -mCer and isoproterenol were probed by immunoblotting at the indicated dilutions (reflecting theoretical bioQp concentration (1-4)). These were compared to the undiluted supernatant obtained after treatment of the sample with streptavidin-coated magnetic beads for 30 s (5), and a no peptide control (6). Treatment of the samples with Streptavidin-coated magnetic beads reduces bioQp concentration to 1.6  $\mu$ M across 4 experiments.

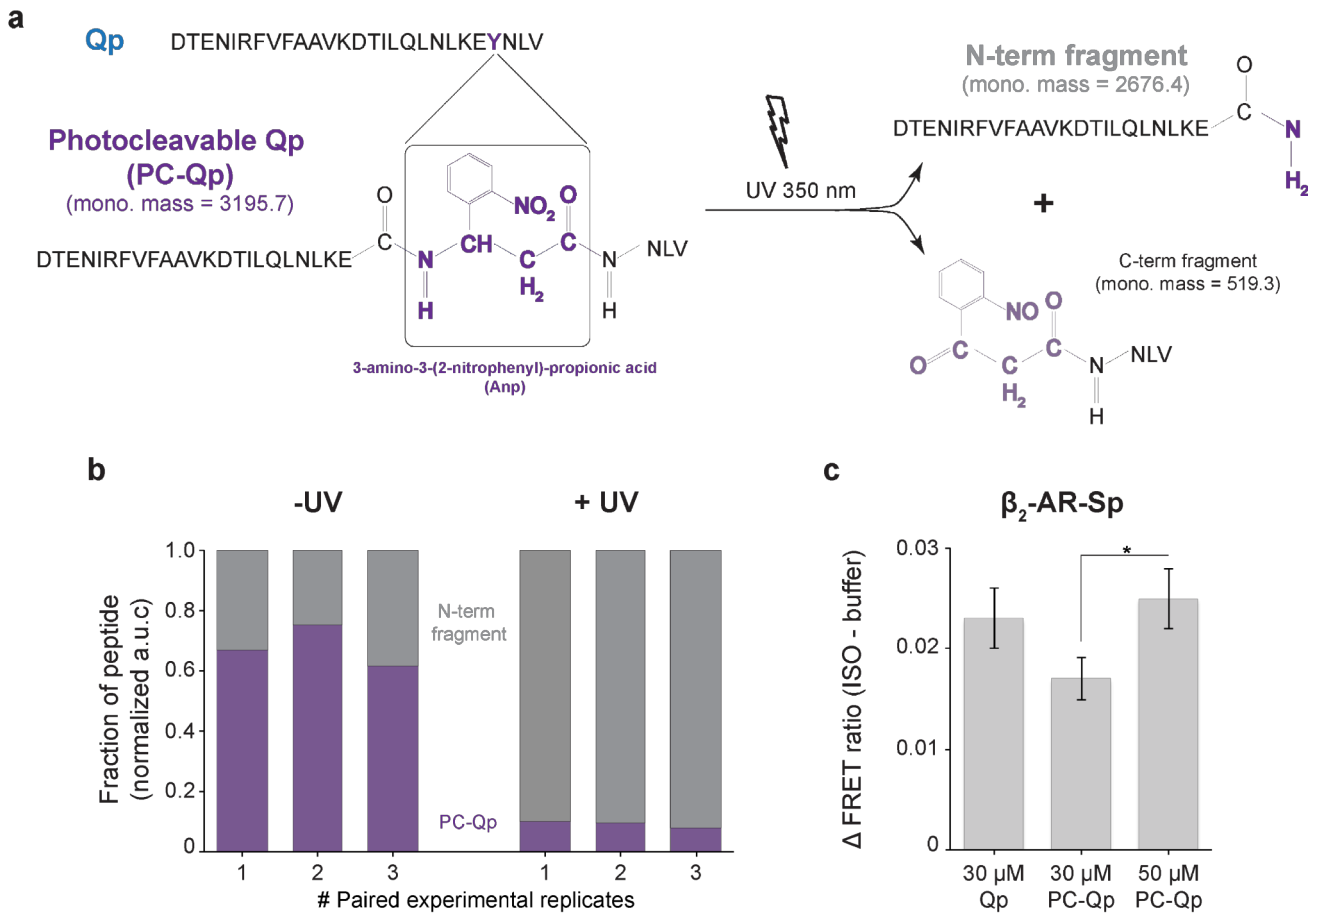

*Supplementary Figure 3 - Photocleavage of PC-Qp by UV irradiation.* (a) Design of photocleavable Qp (PC-Qp) by replacing the indicated Tyrosine (Y356) residue in Qp sequence with 3-amino-3-(2-nitro)phenyl- propionic acid (Anp). Reaction scheme depicting photocleavage products of PC-Qp upon UV irradiation, with average m/z of the resulting fragments. (b) Quantification of the extent of photocleavage of PC-Qp by MALDI-MS. UV irradiation of full length PC-Qp in the presence of native membranes causes the concentration of the full length PC-Qp to fall to 4.58  $\mu$ M, which is less than the critical concentration ( $C_c$ ) required for GPCR priming. (c) Change in FRET ratio following isoproterenol treatment (100  $\mu$ M) of  $\beta_2$ -AR-Sp sensor in the presence of indicated concentrations of Qp or PC-Qp. Values are mean  $\pm$  S.D from 3 experiments (b) or mean  $\pm$  S.D from at least 12 replicates across 3 experiments (c). Statistically significant differences were assessed Students' *t*-test. Significance is denoted by asterisks, \*,  $p < 0.05$ .

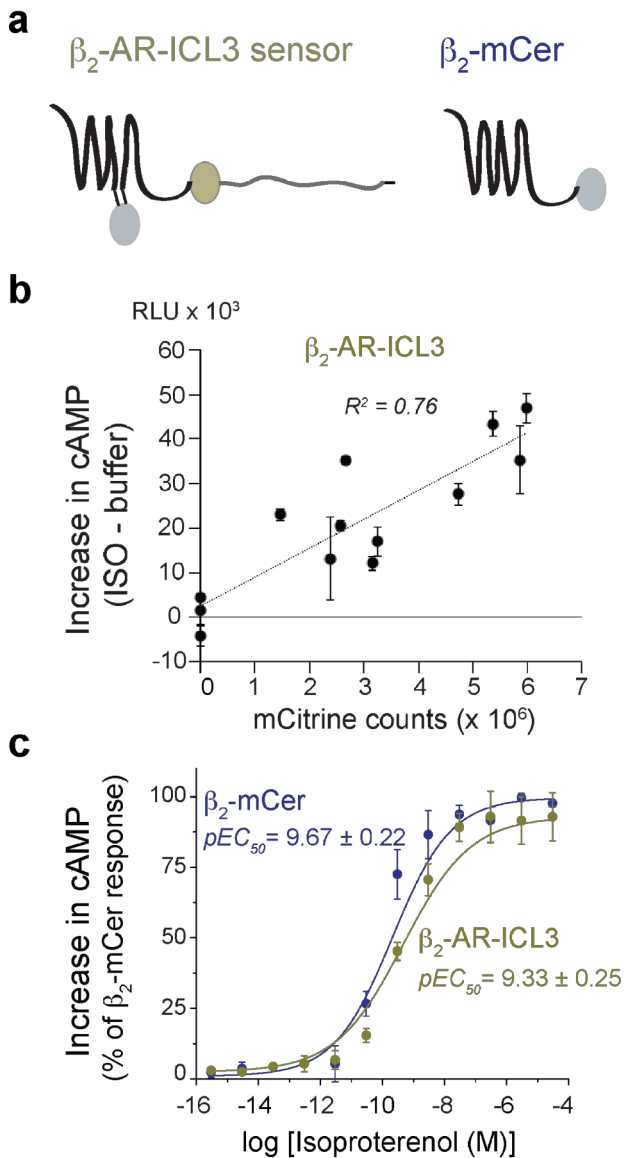

*Supplementary Figure 4 –  $\beta_2$ -AR-ICL3 is capable of stimulating downstream signaling.* (a) Schematic representation of the  $\beta_2$ -AR-ICL3 sensor designed to report on conformational changes in the receptor, compared to the wild-type  $\beta_2$ -AR-mCer. (b) cAMP accumulation in HEK293T cells expressing increasing amounts of  $\beta_2$ -AR-ICL3 sensor, upon stimulation with isoproterenol (10  $\mu$ M), compared to buffer-treated cells. Increasing sensor expression correlates with greater cAMP accumulation ( $R^2 = 0.76$ ). Each data point represents mean  $\pm$  S.D from 4 replicates in a single experiment. Experiments were repeated thrice to obtain multiple x-y pairs. Data was fit to a linear regression to find correlation coefficient. (c) Cells expressing either the control  $\beta_2$ -AR-mCer or the  $\beta_2$ -AR-ICL3 sensor to equivalent levels were stimulated with varying concentrations (0.3 fM to 30  $\mu$ M) of isoproterenol, and the cAMP responses measured. The increase in cAMP is expressed as a percentage, normalized to the cAMP response observed from  $\beta_2$ -AR-mCer expressing cells at saturating concentration of isoproterenol. The cAMP response data were fit to a four-parameter logistic function to obtain dose-response curves and estimate potency ( $pEC_{50}$ ). Values are mean  $\pm$  S.D from at least 9 repeats across 3 experiments

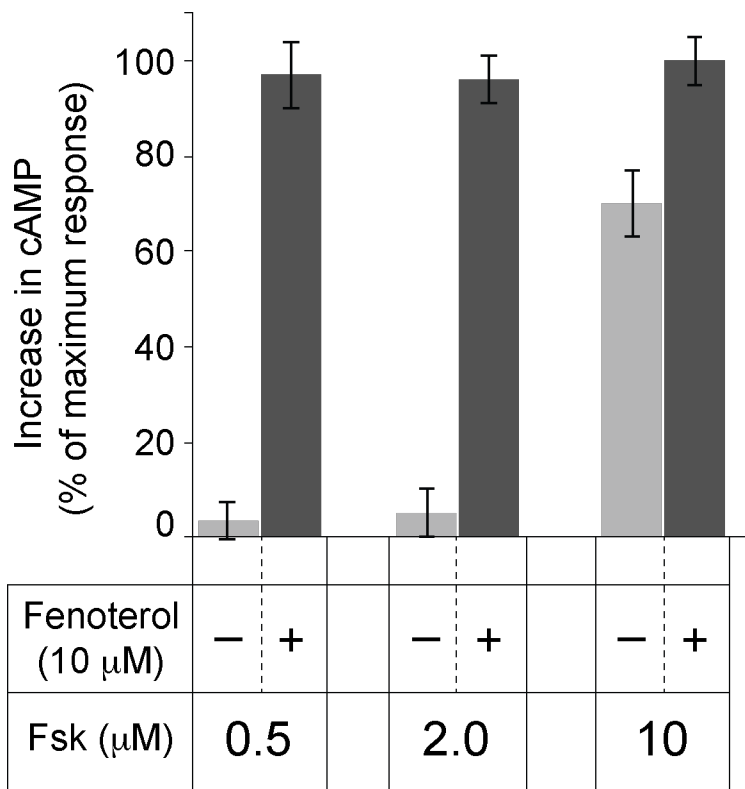

*Supplementary Figure 5 - Forskolin synergizes signaling downstream of endogenous  $\beta_2$ -AR. (a) cAMP accumulation in HEK293T cells over-expressing  $G\alpha_q$  (mCer-tag), following stimulation with forskolin (Fsk) at either 2  $\mu$ M or 10  $\mu$ M, fenoterol (10  $\mu$ M), or a combination of forskolin (2  $\mu$ M) and fenoterol (10  $\mu$ M).*

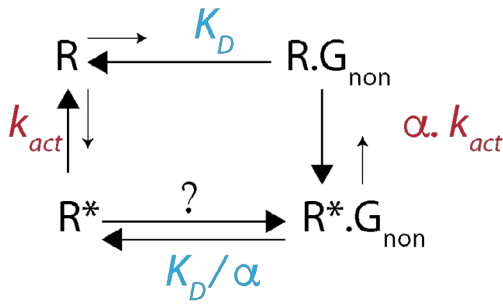

$$k_{act} = [R^*] / [R]$$

$$K_D = [R][G_{non}] / [R.G_{non}]$$

$$\alpha k_{act} = [R^*.G_{non}] / [R.G_{non}]$$

$$K_D/\alpha = [R^*][G_{non}] / [R^*.G_{non}]$$

Expressing in terms of R and G<sub>non</sub>

$$[R^*] = k_{act} * [R]$$

$$[R.G_{non}] = [R][G_{non}] / K_D$$

$$[R^*.G_{non}] = \alpha \cdot k_{act} [R][G_{non}] / K_D$$

If  $R \ll G_{non}$ ,  $G_{non} \sim G_t$  (total non cognate G protein)

$$[R^*] = k_{act} * [R]$$

$$[R.G_{non}] = [R][G_t] / K_D$$

$$[R^*.G_{non}] = \alpha \cdot k_{act} [R][G_t] / K_D$$

### Total receptor

$$R_t = R + R^* + R.G_{non} + R^*.G_{non}$$

$$[R_t] = [R] + (k_{act} * [R]) + ([R][G_t] / K_D) + (\alpha \cdot k_{act} [R][G_t] / K_D)$$

$$[R_t] = [R] \{ 1 + k_{act} + ([G_t] / K_D) + (\alpha \cdot k_{act} \cdot [G_t] / K_D) \}$$

parameter estimation for fitting:

$k_{act}$  = must be less than 1

$G_t$  = 10 nM to 30  $\mu$ M

$K_D$  is estimated from Qp binding to  $\beta$ 2-mCer

$K_D$  = 100  $\mu$ M

$\alpha$  = arbitrary values between 0.01 and 100

Ratio of primed to total receptor is calculated as

$$R^*/R_t = (k_{act} * [R]) / [R] \{ 1 + k_{act} + ([G_t] / K_D) + (\alpha \cdot k_{act} \cdot [G_t] / K_D) \}$$

$$R^*/R_t = k_{act} / \{ 1 + k_{act} + ([G_t] / K_D) + (\alpha \cdot k_{act} \cdot [G_t] / K_D) \}$$

Supplementary Figure 6 – Equilibrium model of GPCR priming through non-cognate G protein interactions.

(a) Receptor-non-cognate G protein interaction modeled on the Ternary Complex Model of cognate G protein signalling. Receptor interactions with the G protein enhance transition to the primed state as modeled by the cooperativity factor ( $\alpha$ ). Fraction of receptor in the primed state ( $R^*/R_t$ ) is calculated based on estimates of G protein concentration (10 nM to 30  $\mu$ M) and binding affinity of the non-cognate G peptide (Qp) to  $\beta$ 2-mCerulean membranes (100  $\mu$ M).

**a**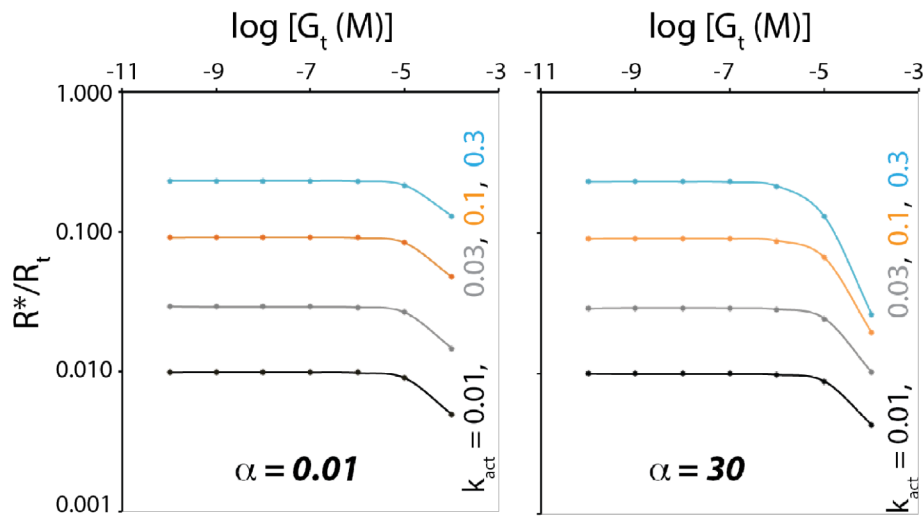**b**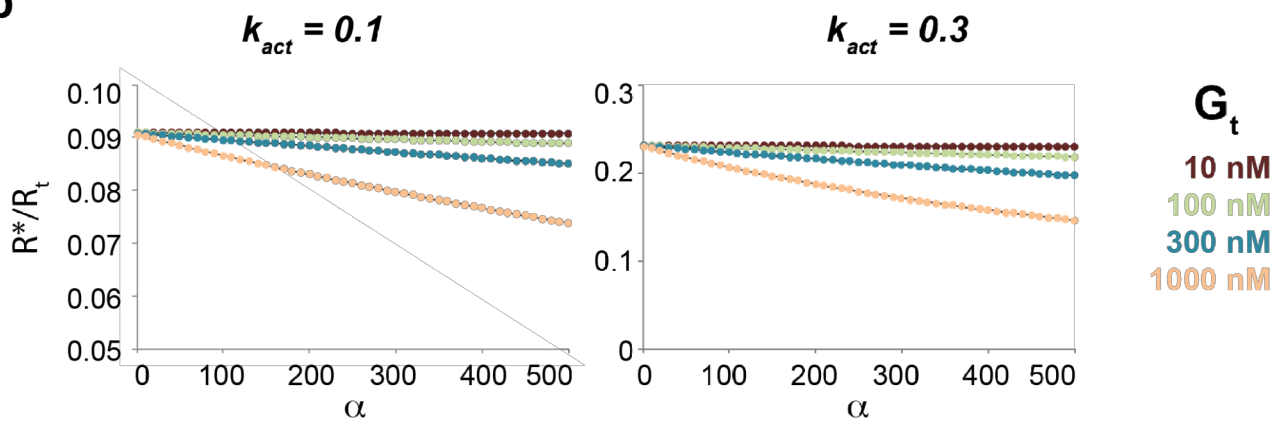

Supplementary Figure 7 – Equilibrium ternary complex model of GPCR signaling does not show augmented response in the presence of enhanced non-cognate G protein expression. Fraction of primed receptor ( $R^*/R_t$ ) decreases with G protein expression, regardless of the fraction of spontaneously primed receptor ( $k_{act}$ ; **a**) or cooperativity factor ( $\alpha$ ; **b**).



## Supplementary Table 1

Three aspects of GPCR signaling that exhibit temporal persistence

- (1) GPCR conformation –  $\beta_2$ -AR ICL3 sensor ( $\beta_2$ -AR conformation in parameter column);
- (2) GPCR activation state –  $\beta_2$ -AR-Sp SPASM sensor (Tethered Sp interaction with  $\beta_2$ -AR); and
- (3) G protein activation in *in vitro* reconstituted membranes (G protein activation). The details for each are tabulated

|   | Parameter                                  | Priming Peptide | Sensor used            | Persistence time  |                    |                    |
|---|--------------------------------------------|-----------------|------------------------|-------------------|--------------------|--------------------|
|   |                                            |                 |                        | Minimum           | Maximum            | $t_{1/2}$          |
| 1 | Tethered Sp interaction with $\beta_2$ -AR | bioQP           | $\beta_2$ -AR-Sp SPASM | 90 s<br>(1 ½ min) | 150 s<br>(2 ½ min) | 330 s<br>(5.6 min) |
| 2 | Tethered Sp interaction with $\beta_2$ -AR | PC-Qp           | $\beta_2$ -AR-Sp SPASM | 165 s<br>(2¾ min) | 240 s<br>(4 min)   |                    |
| 4 | $\beta_2$ -AR conformation                 | bioQp           | $\beta_2$ -AR-ICL3     | 150 s<br>(2½ min) | 240 s<br>(4 min)   |                    |
| 5 | $\beta_2$ -AR conformation                 | PC-Qp           | $\beta_2$ -AR-ICL3     | 105 s<br>(1¾ min) | 240 s<br>(4 min)   | 97 s<br>(1½ min)   |
| 6 | G protein activation                       | PC-Qp           | $\beta_2$ -AR-cherry   | 60 s              |                    |                    |

## Supplementary Table 2

Sequences of G $\alpha$  subunit c-terminus peptides with hot-spot substitutions highlighted in red.

Sp, DTENIRRVFNDCRDIIQRMHLRQYELL;  
Sp  $\rightarrow$  Qp DTENIRRVFNDCRDIIQRMHLRQY**N**LL (E392N)  
Qp, DTENIRFVFAAVKDTILQLNLKEYNLV  
Qp  $\rightarrow$  Sp DTENIRFVFAAVKDTI**Q**QLNLK**Q**YNLV (L349Q; E355Q)

## Supplementary Table 2

Primers for creating the  $\beta_2$ -AR-ICL3 sensor

Inserting AgeI site in-frame with  $\beta_2$ -AR

AgeI insert FP CCAGGTGGAGCAGGATAC**CGGTGGGCGGACGGGG**  
AgeI insert RP CCCC GTCCGCCACCGGTATCCTGCTCCACCTGG

PCR and insert mCer in-frame with  $\beta_2$ -AR into AgeI introduced above:

AgeImCer Flex FP GATACCGGTtctcaGGTtctcagtgagcaagggcgaggagctg  
AgeImCer Flex RP CCGCCaccgggtgaggaACCTgaggaCTtgtacagctcgtccatg
